# Supplementary material
Source: PubMed Central journal article supplement (PMC5801488)

# Supplemental Figure 1.

## NSC Western Blot:

C57 NSC:

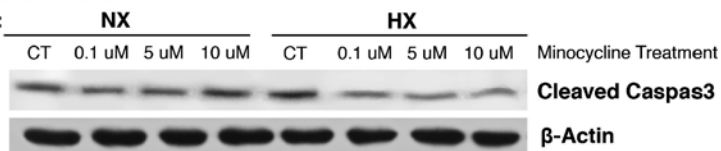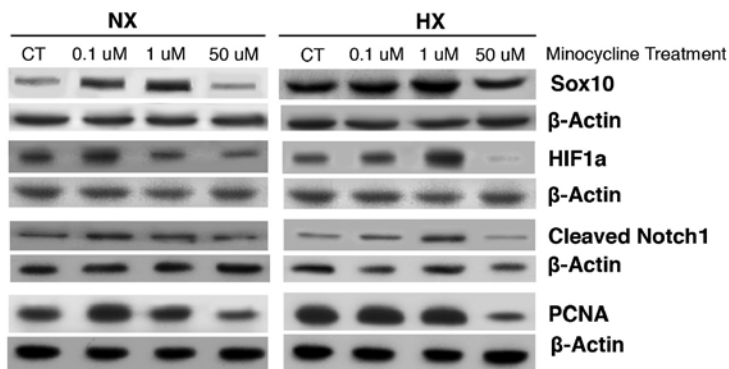

CD1 NSC:

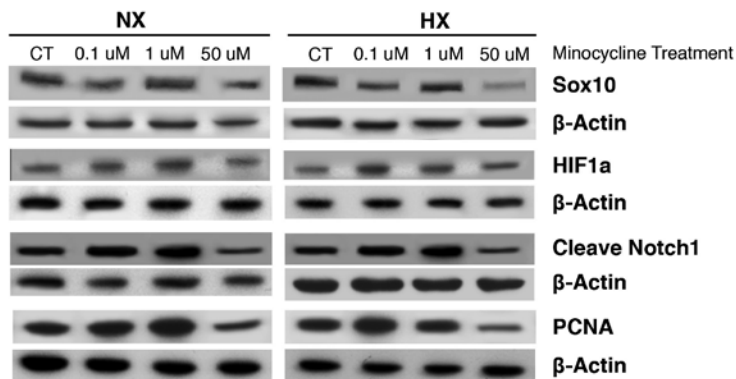

Supplement: mmc1.pdf [file mmc1.pdf]

# Ratios ([MC]/CT)

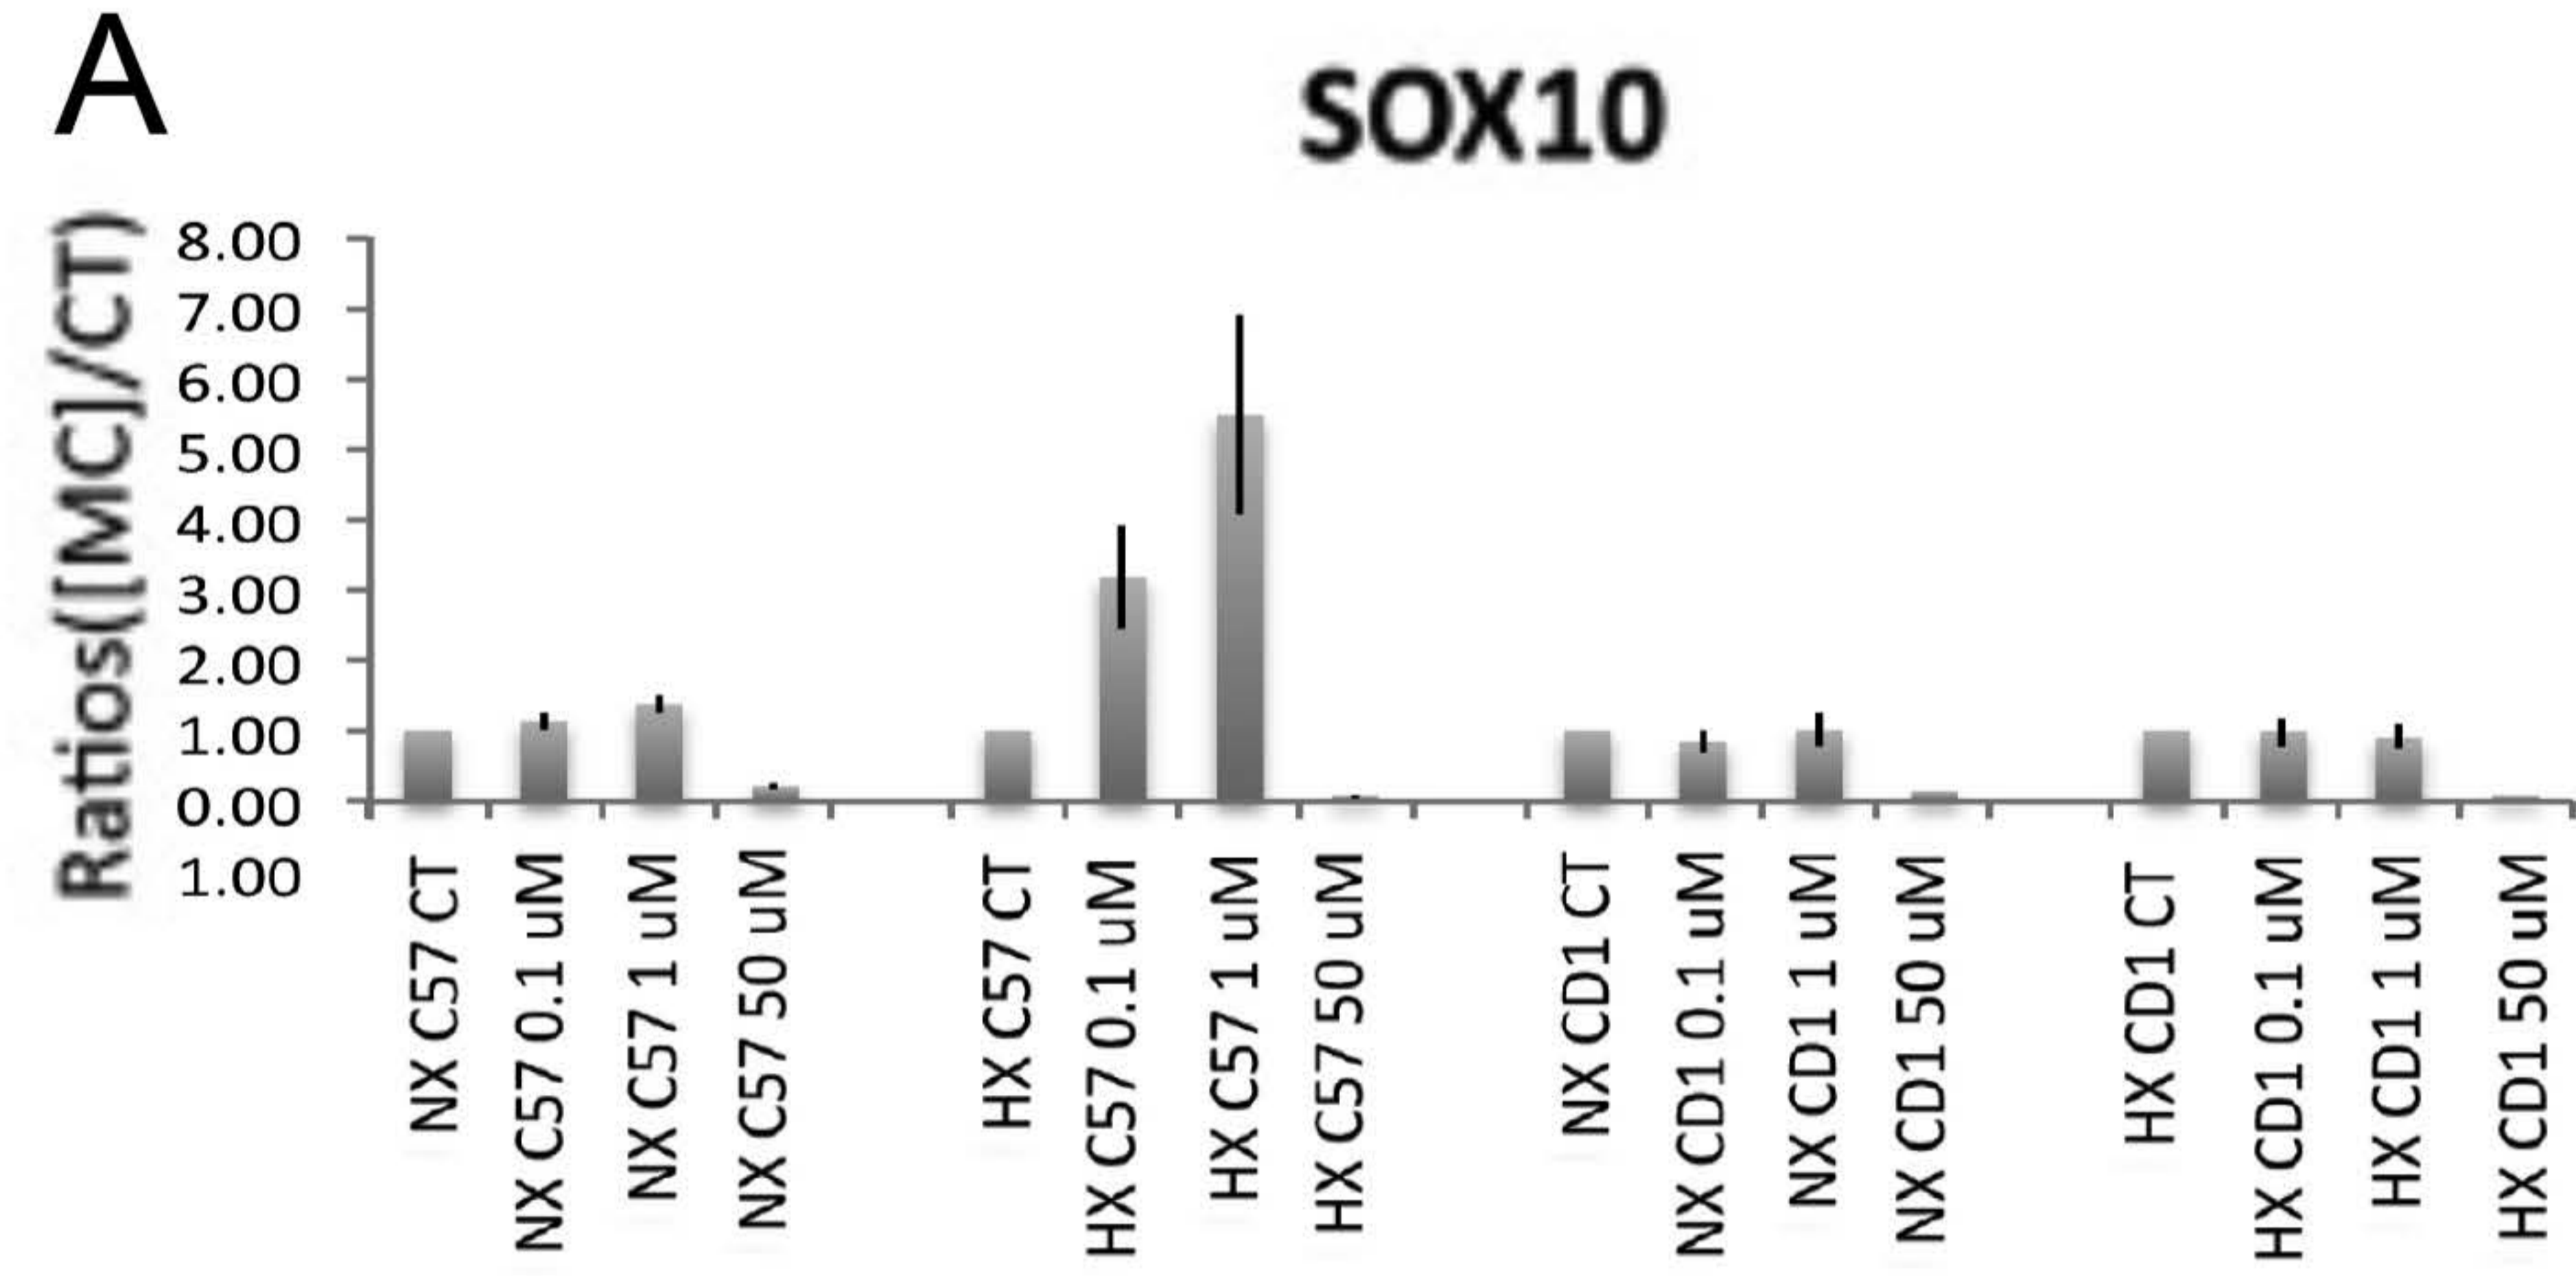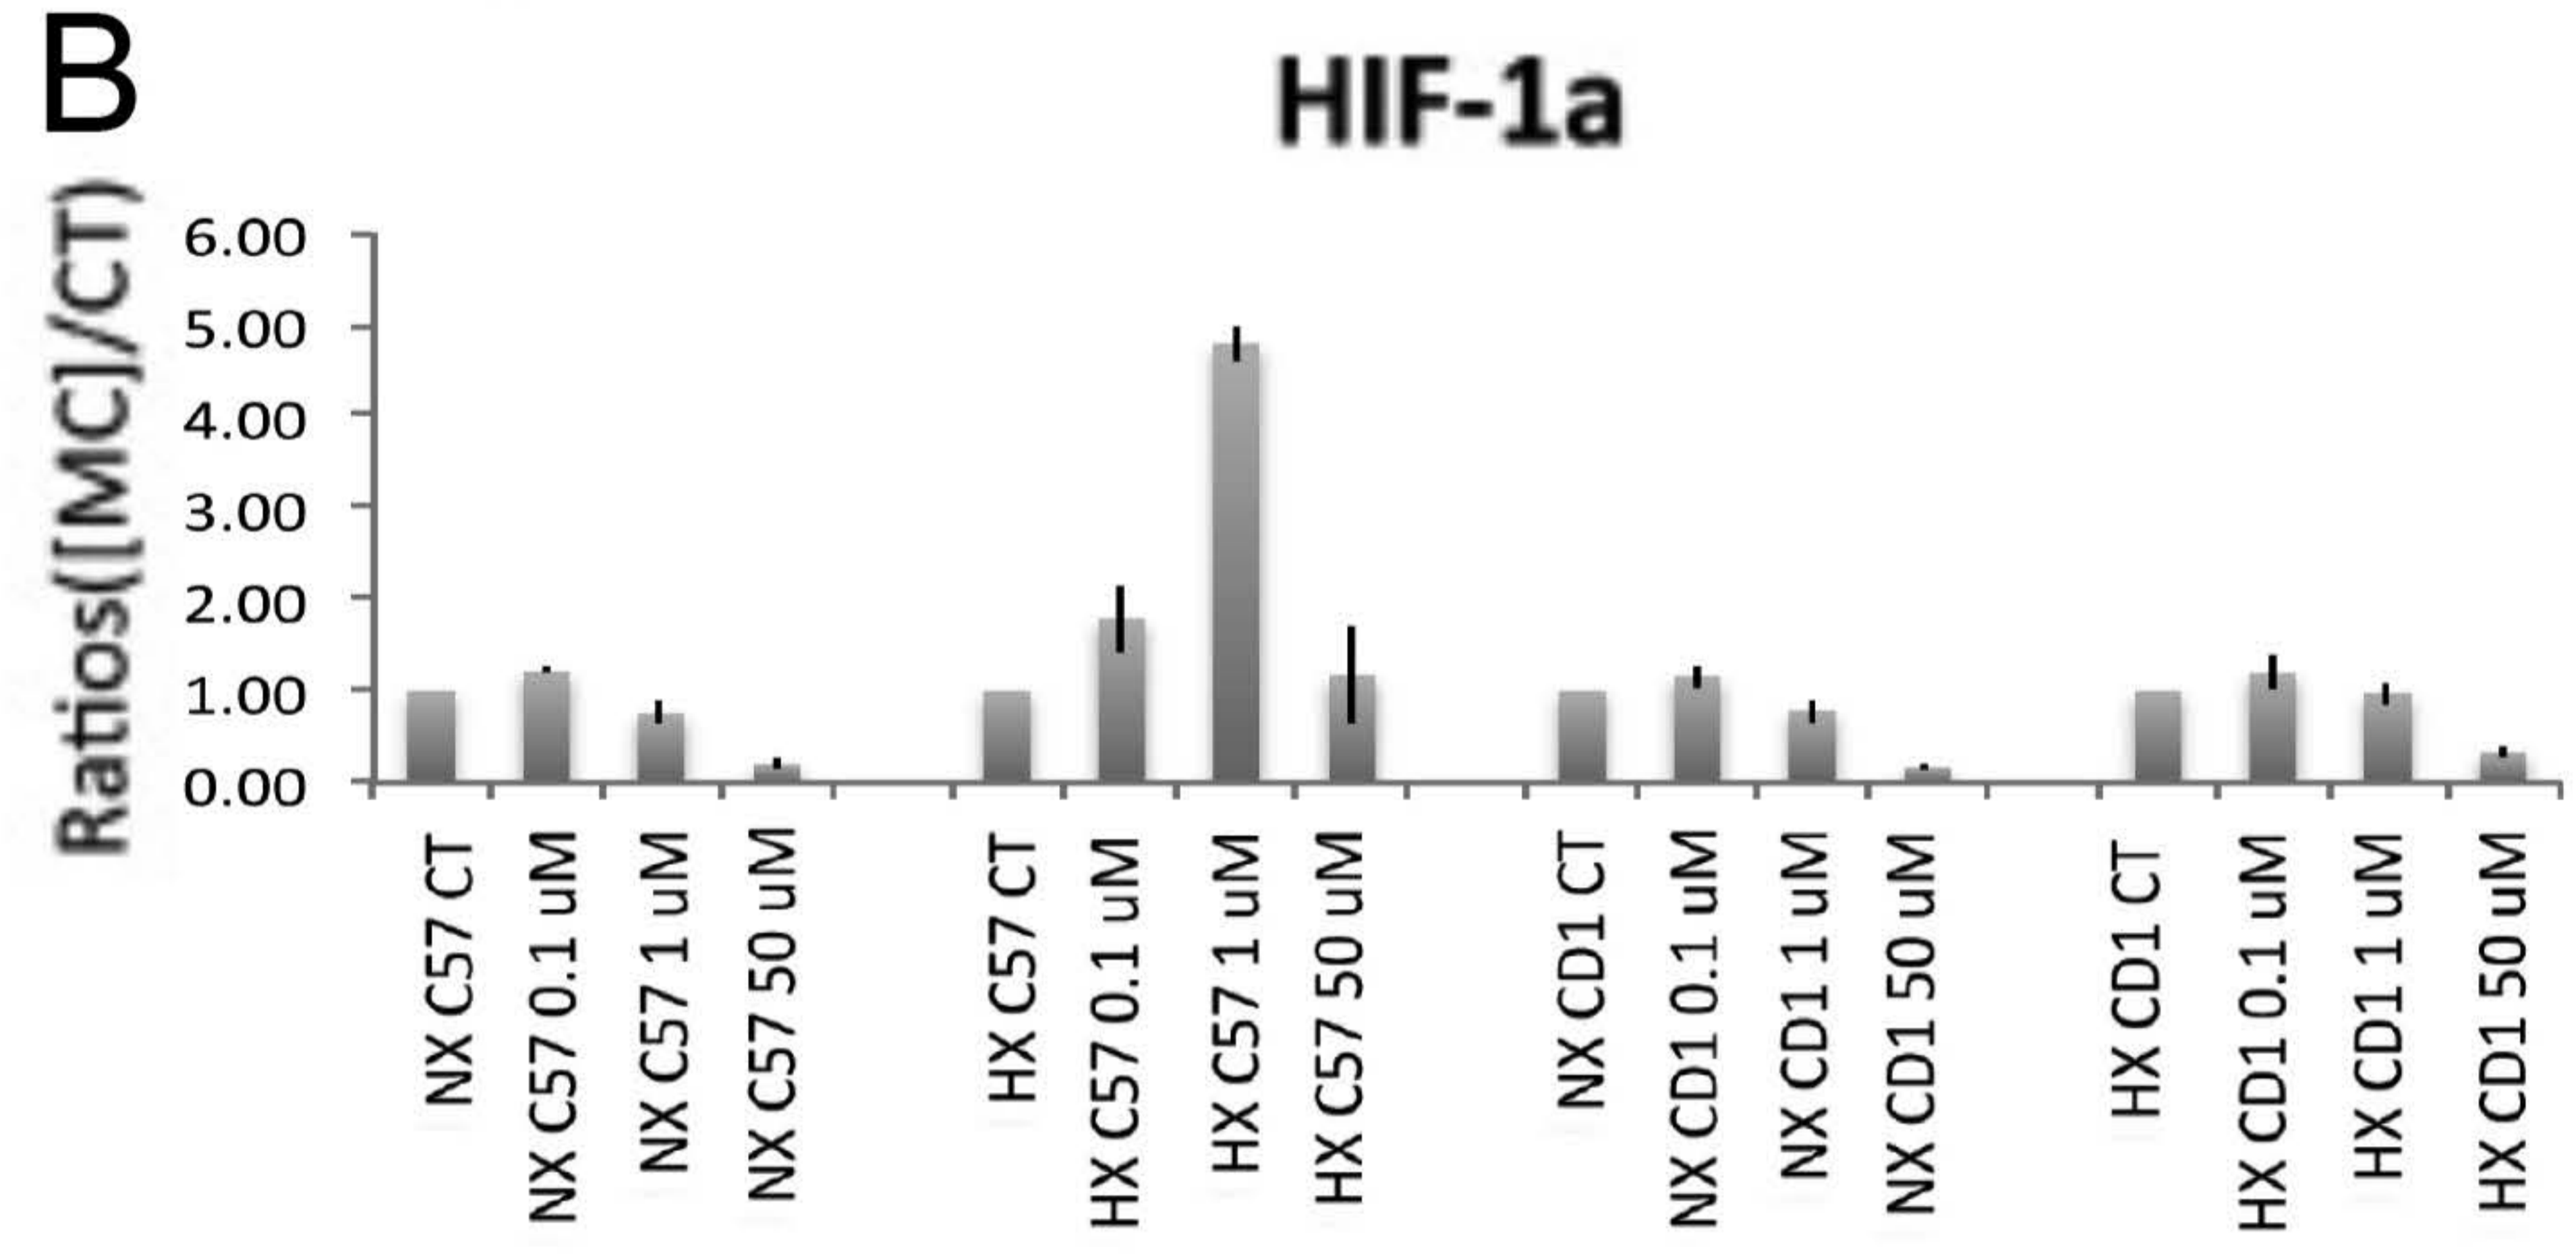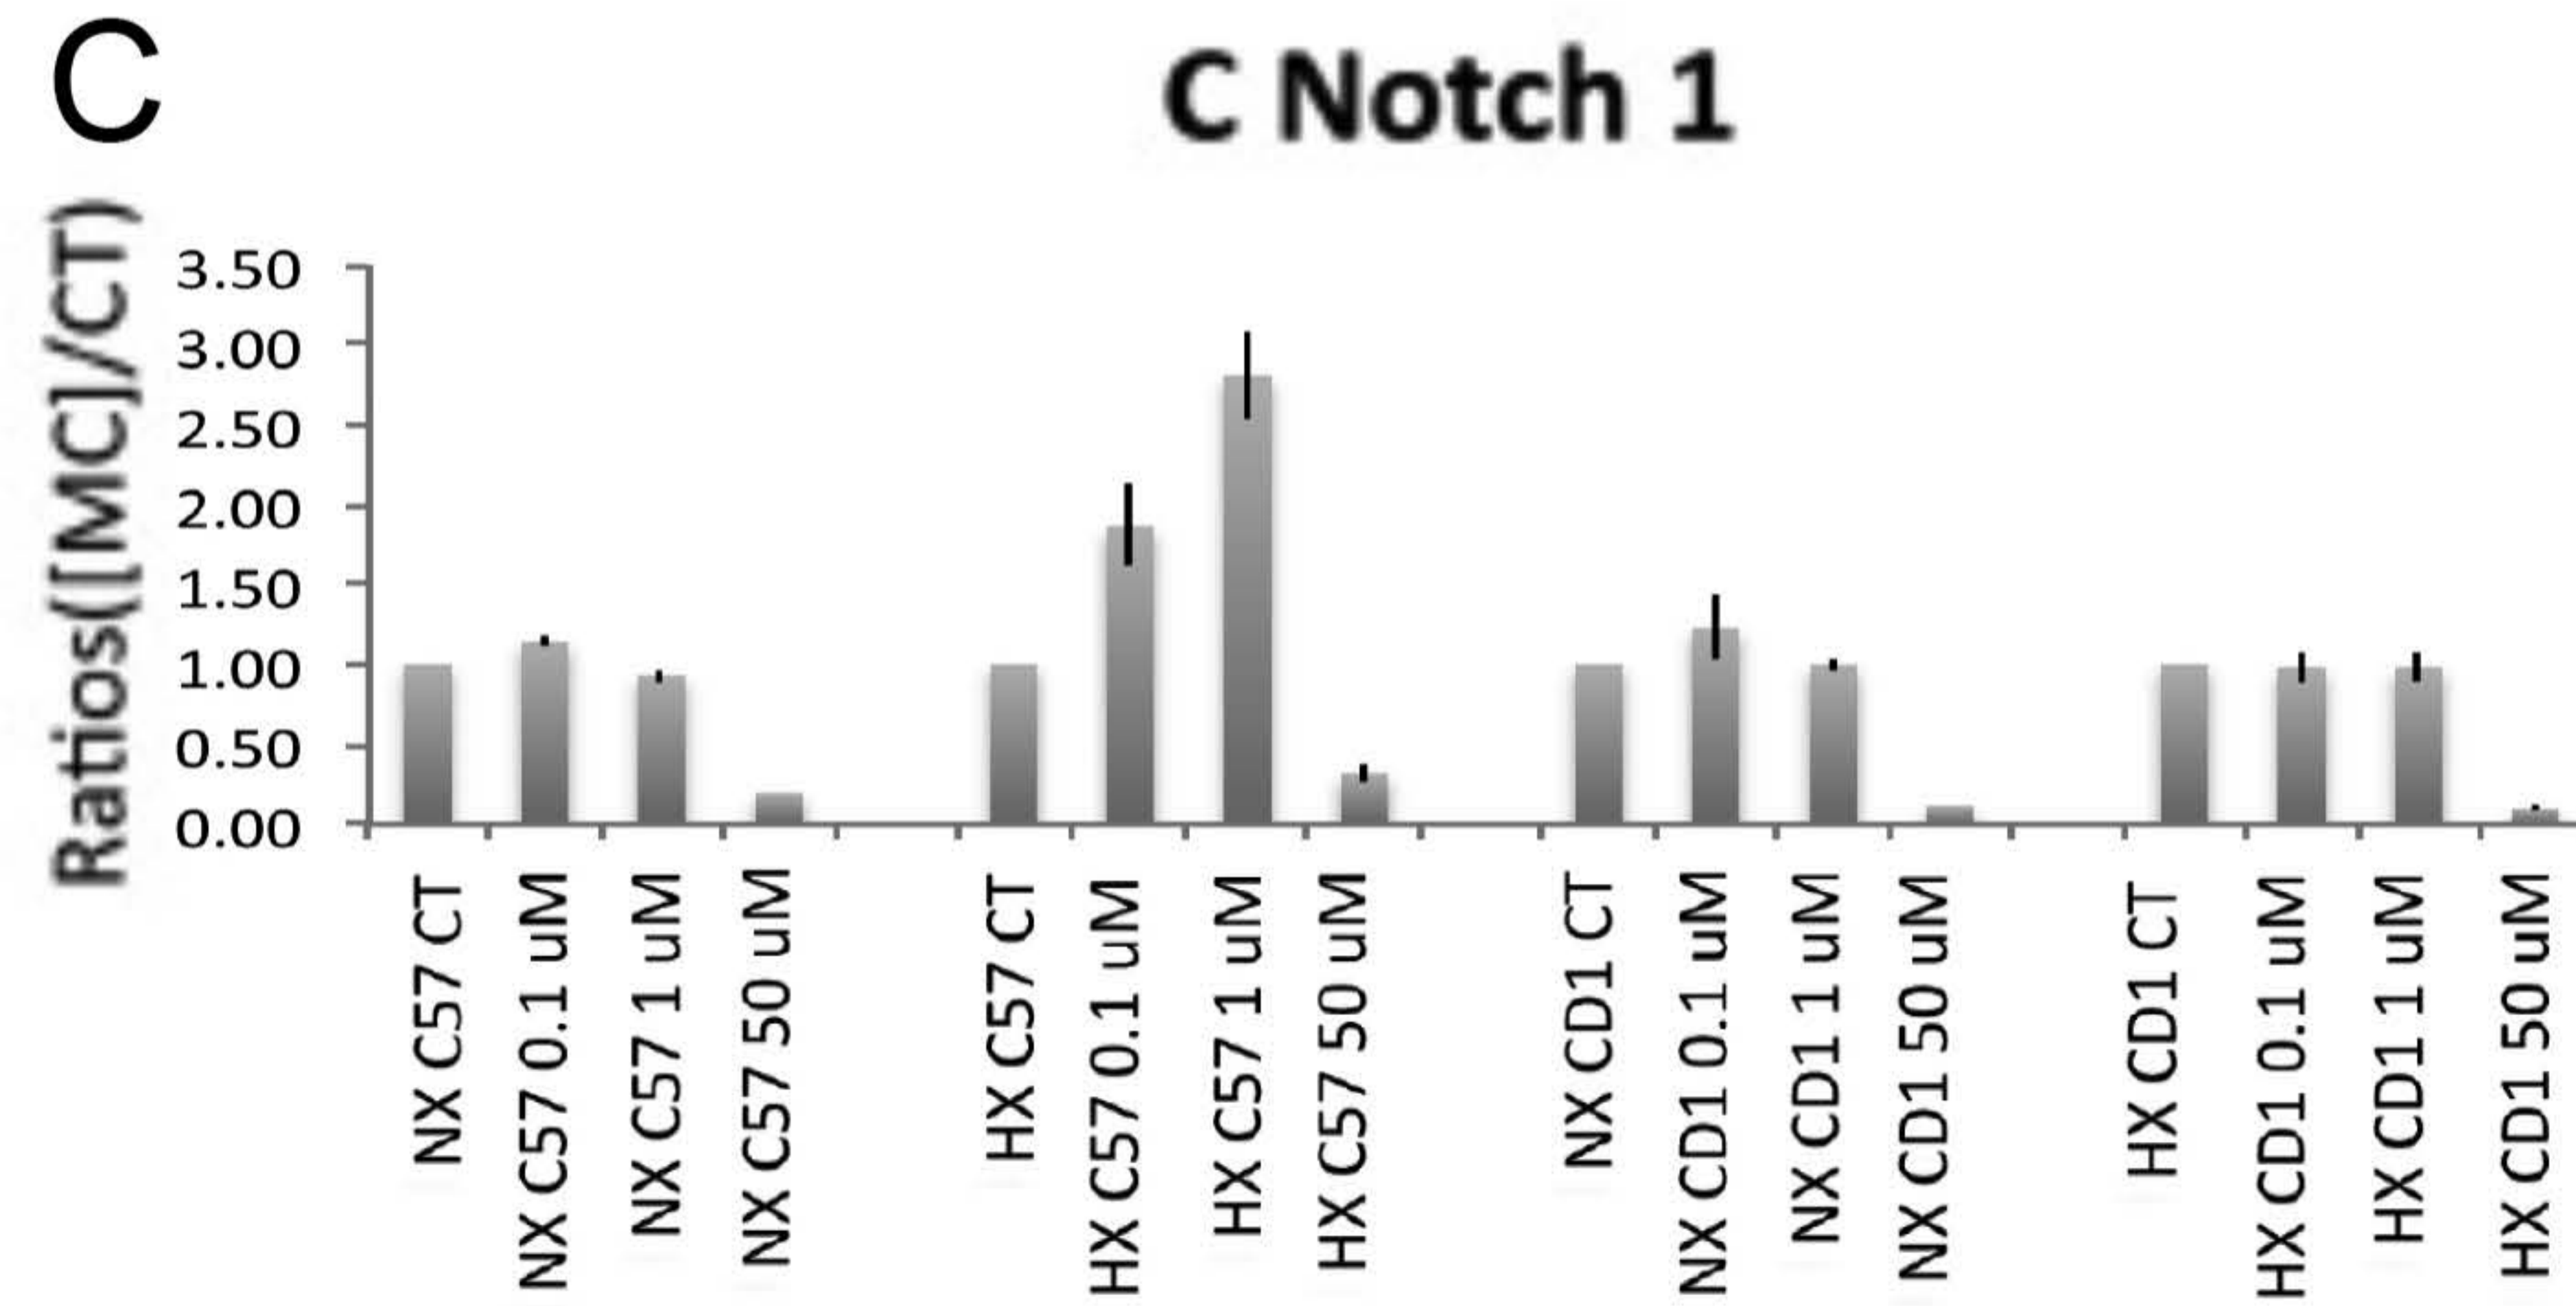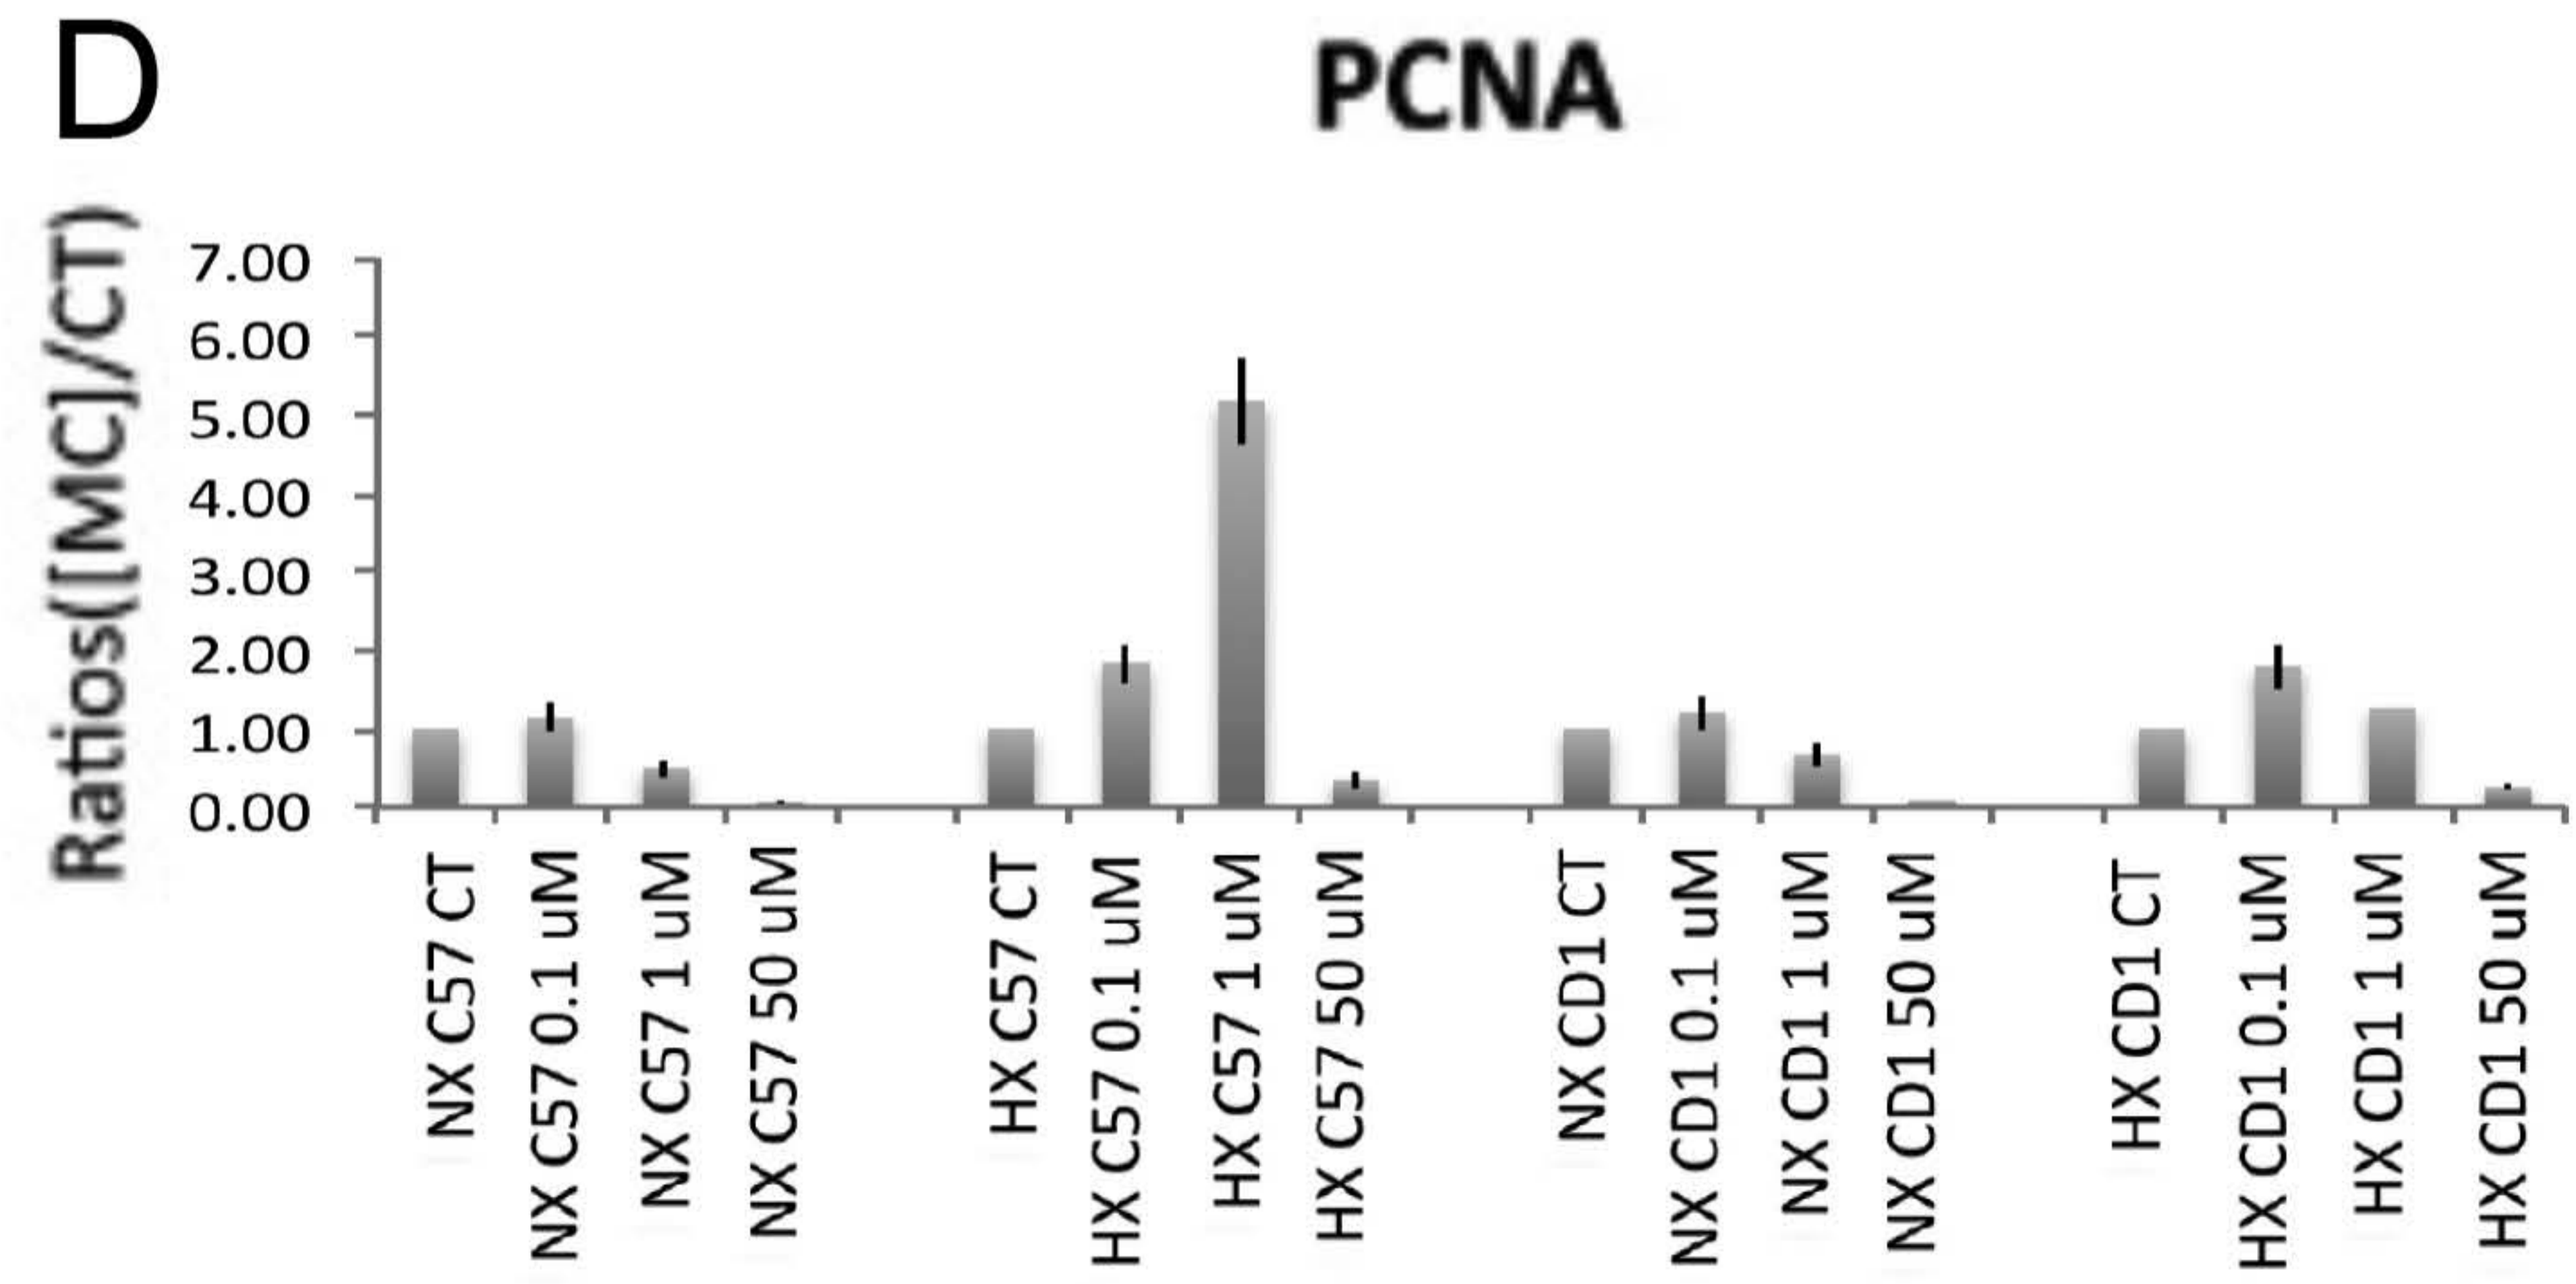

Supplement: mmc2.pdf [file mmc2.pdf]

# Supplemental Figure 3.

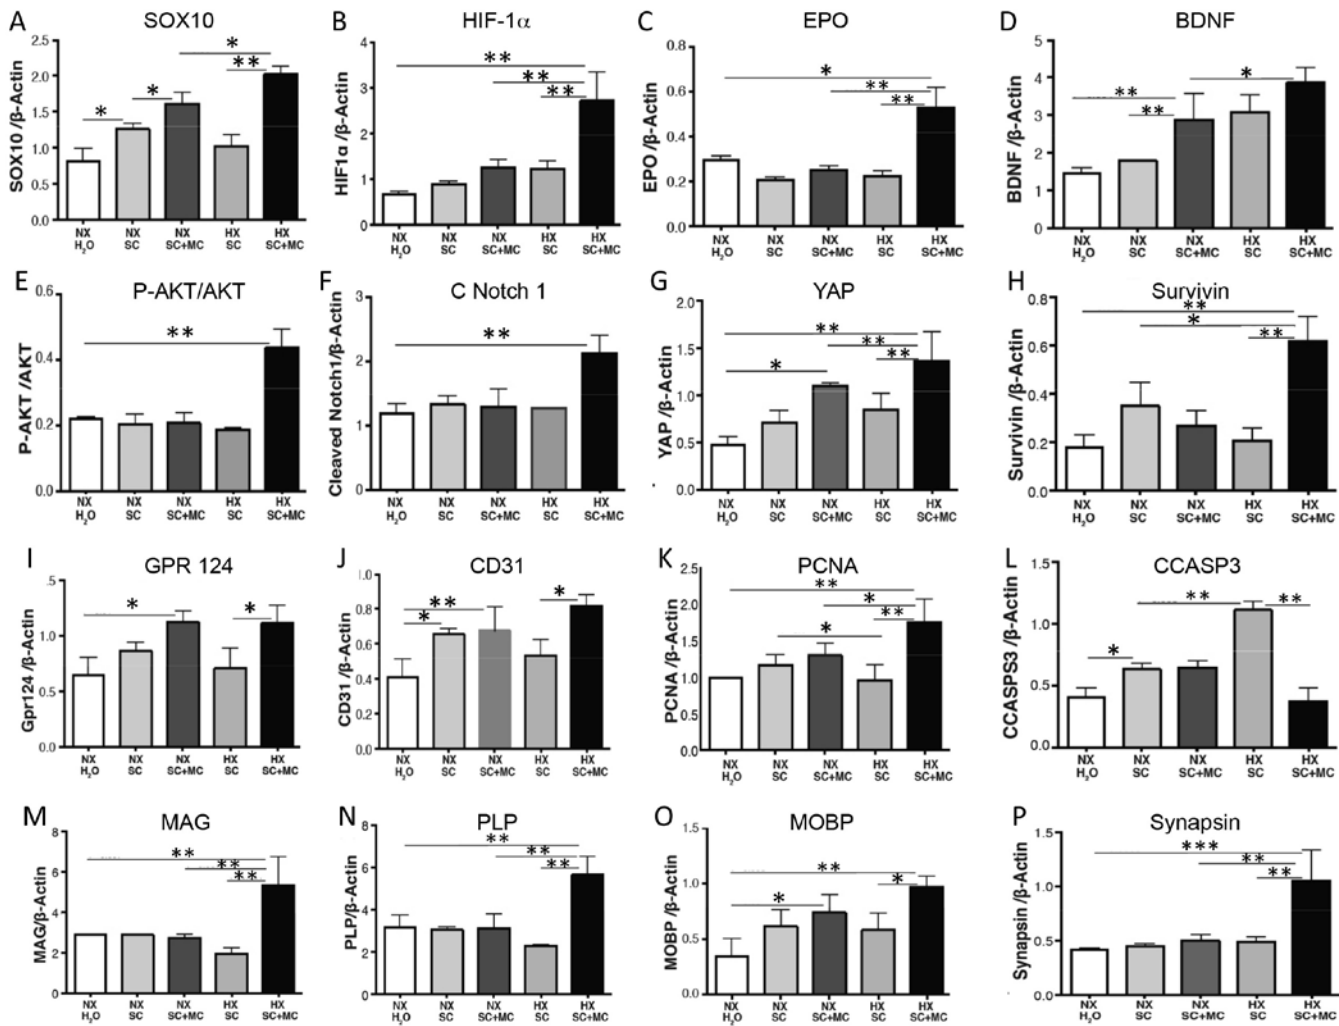

Supplement: mmc3.pdf [file mmc3.pdf]

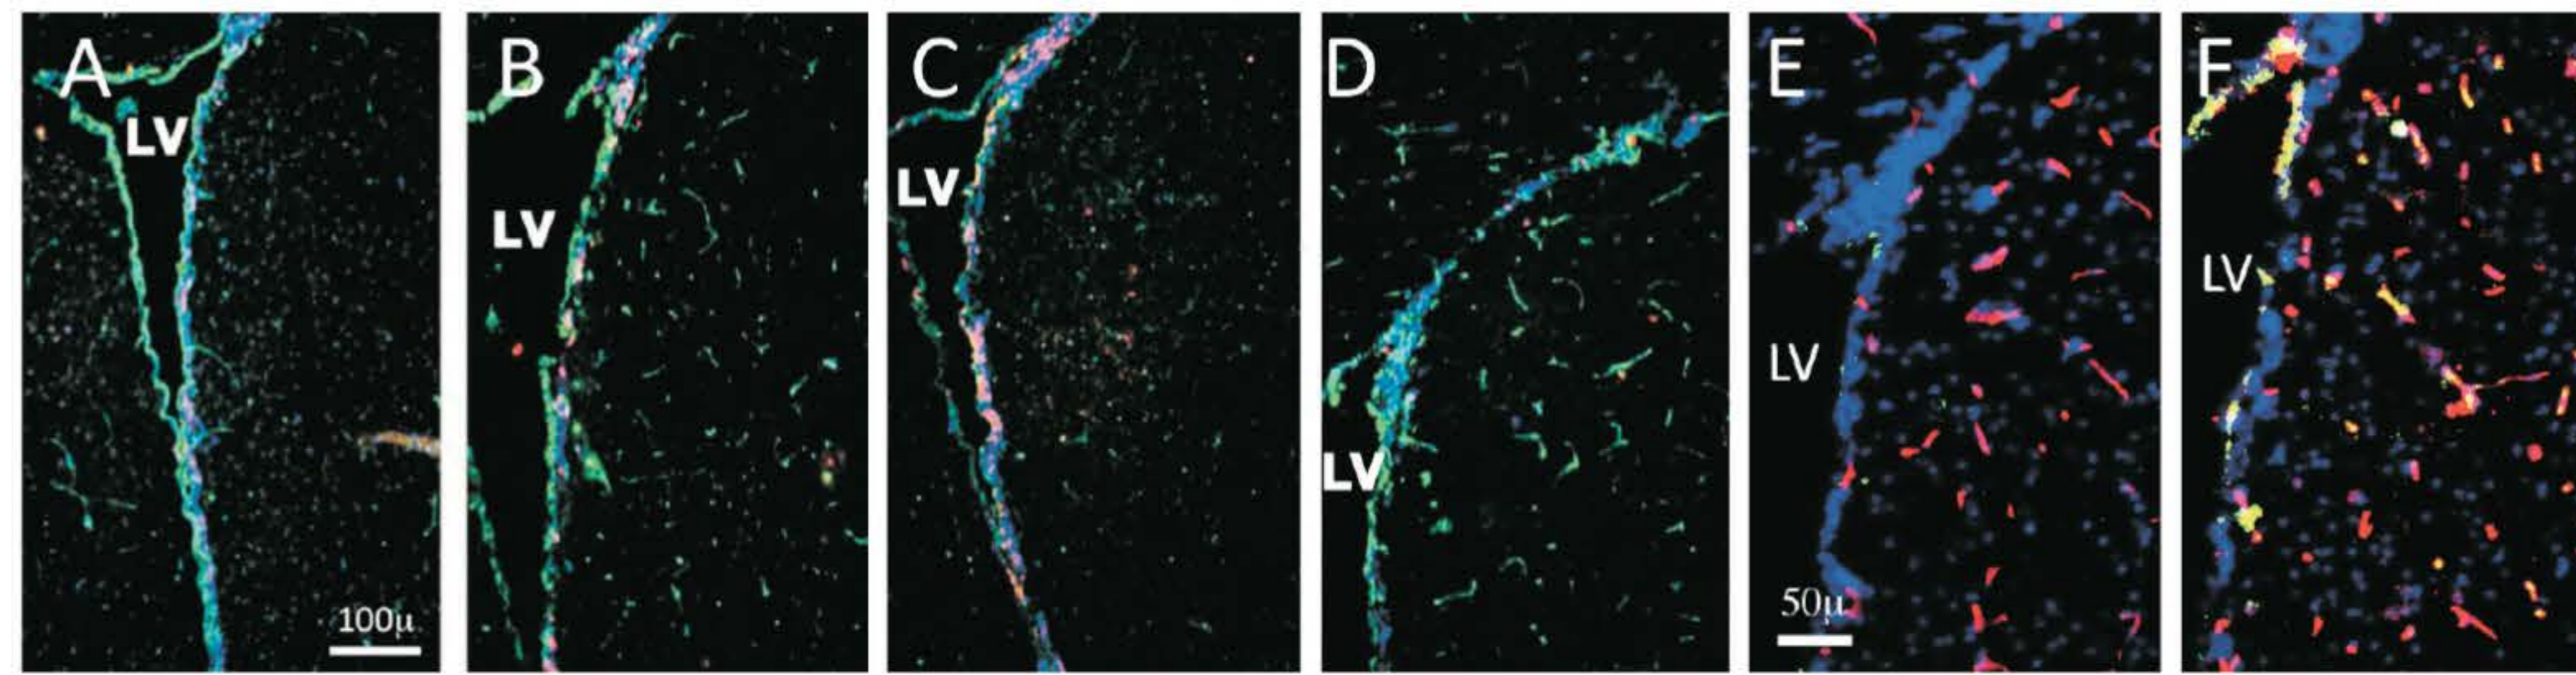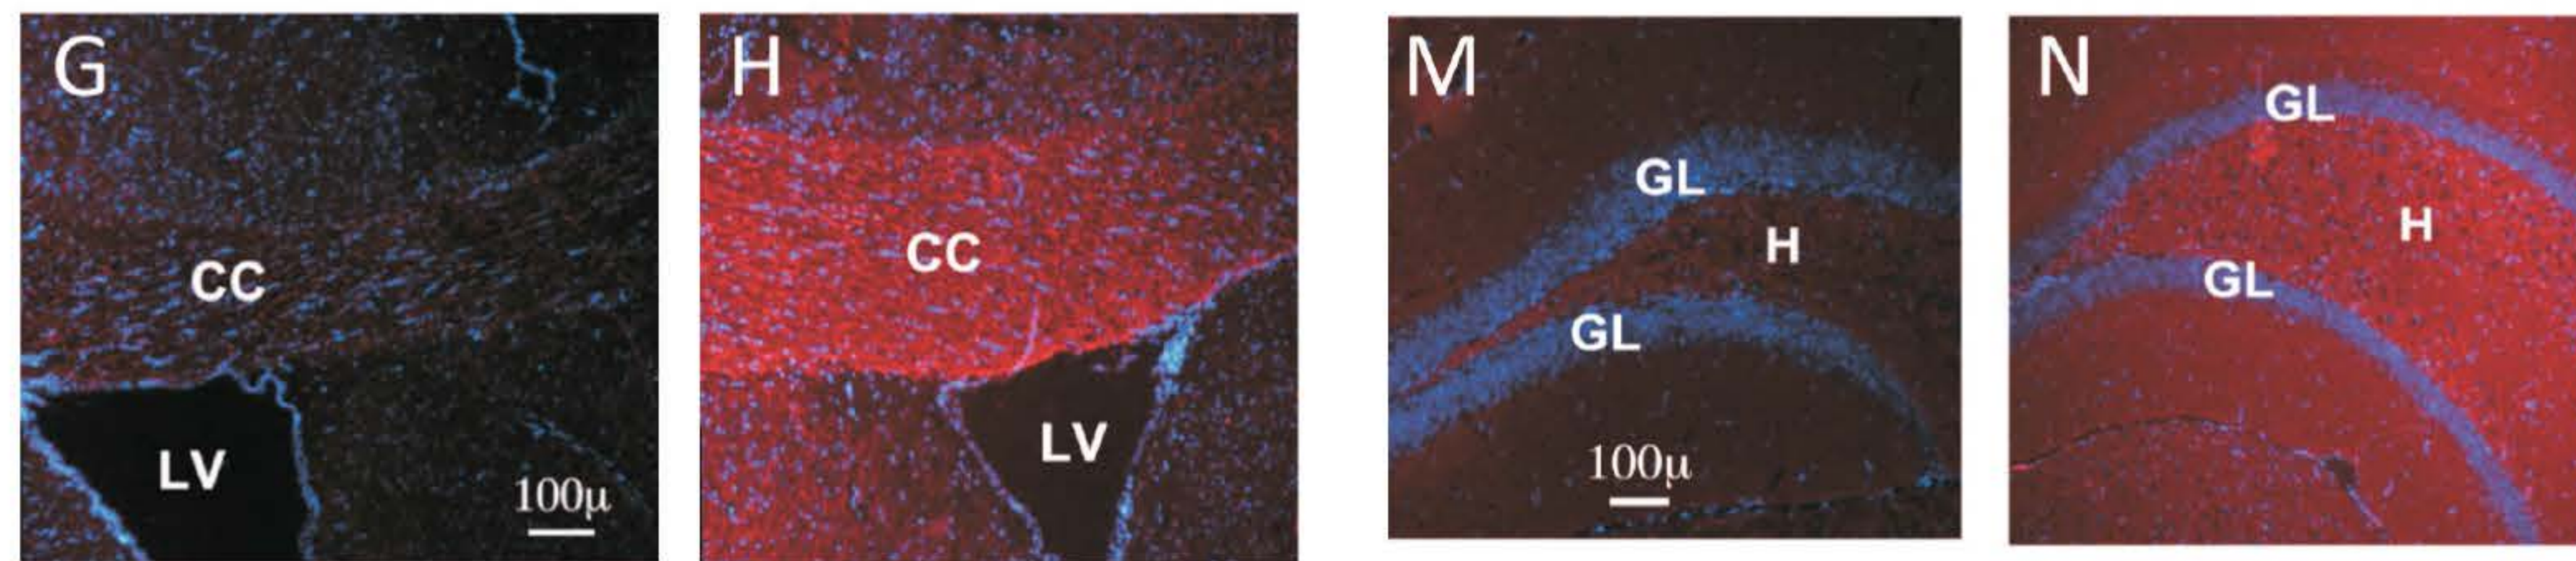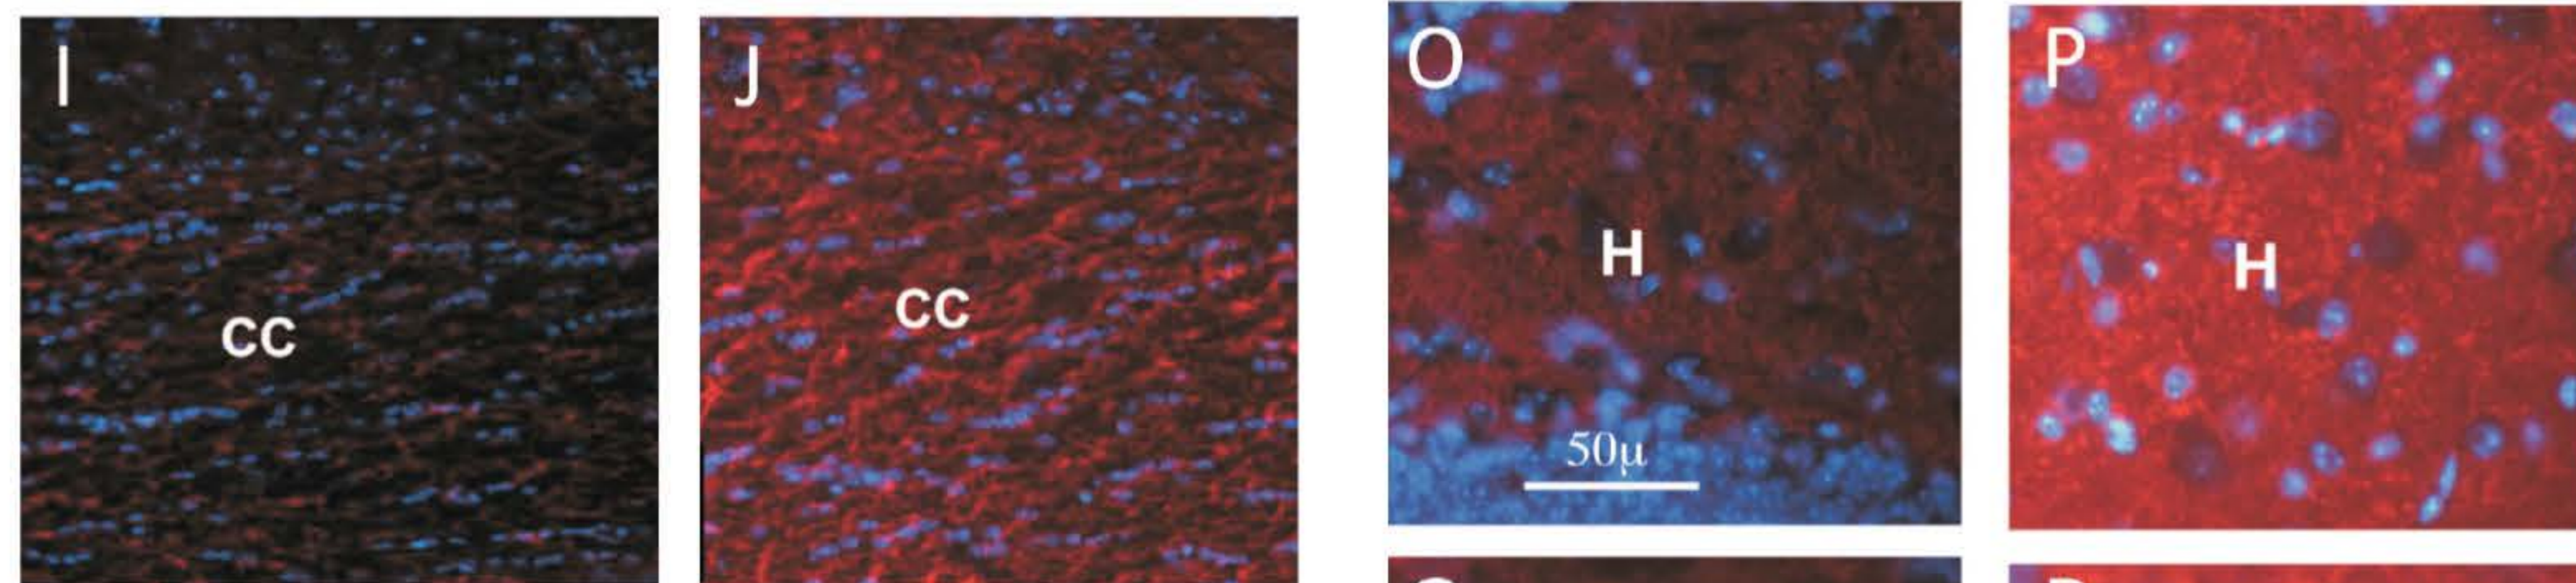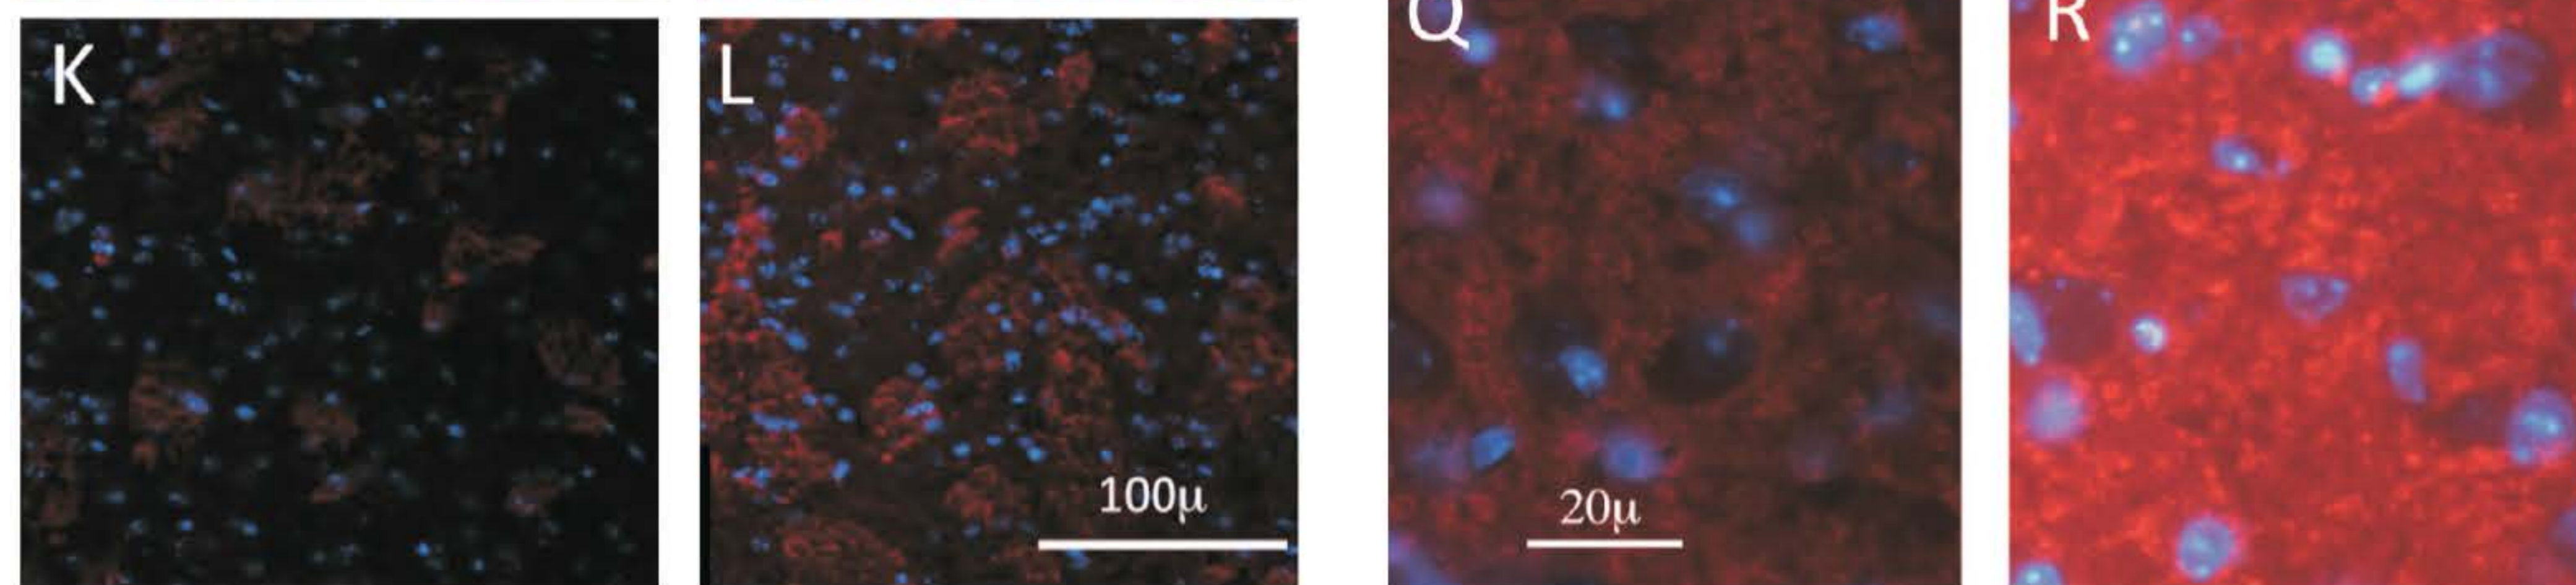

Supplement: mmc4.pdf [file mmc4.pdf]
